# Supplementary material for: Geographical Distribution of Periodontitis Risk and Prevalence in Portugal Using Multivariable Data Mining and Modeling
Source: MDPI journal article supplement (doi:10.3390/ijerph192013634), 2022-10-20
Supplement: s1 [file s1]

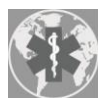

Article

# Geographical Distribution of Periodontitis Risk and Prevalence in Portugal Using Multivariable Data Mining and Modeling

## Supplementary Materials

**Supplementary Table S1.** Local Administrative Units 1 (municipalities) cluster distribution.

| Municipalities     | Cluster | Score |
|--------------------|---------|-------|
| Abrantes           | 2       | 11.78 |
| Águeda             | 2       | 10.54 |
| Aguiar da Beira    | 1       | 6.90  |
| Alandroal          | 1       | 10.82 |
| Albergaria-a-Velha | 2       | 10.62 |
| Albufeira          | 2       | 12.96 |
| Alcácer do Sal     | 2       | 10.69 |
| Alcanena           | 2       | 10.82 |
| Alcobaça           | 3       | 10.54 |
| Alcochete          | 2       | 14.70 |
| Alcoutim           | 1       | 6.52  |
| Alenquer           | 2       | 11.17 |
| Alfândega da Fé    | 1       | 8.24  |
| Alijó              | 1       | 9.06  |
| Aljezur            | 1       | 9.05  |
| Aljustrel          | 1       | 9.73  |
| Almada             | 5       | 14.71 |
| Almeida            | 1       | 7.90  |
| Almeirim           | 2       | 12.94 |
| Almodôvar          | 1       | 7.70  |
| Alpiarça           | 1       | 13.57 |
| Alter do Chão      | 1       | 12.00 |
| Alvaiázere         | 1       | 8.95  |
| Alvito             | 1       | 10.11 |
| Amadora            | 3       | 16.66 |
| Amarante           | 3       | 10.23 |
| Amares             | 1       | 10.12 |
| Anadia             | 2       | 10.74 |
| Angra do Heroísmo  | 2       | 10.95 |
| Ansião             | 1       | 9.38  |
| Arcos de Valdevez  | 1       | 10.50 |
| Arganil            | 1       | 10.03 |
| Armamar            | 1       | 8.47  |
| Arouca             | 2       | 9.19  |
| Arraiolos          | 1       | 8.12  |
| Arronches          | 1       | 11.02 |
| Arruda dos Vinhos  | 2       | 9.30  |
| Aveiro             | 3       | 12.93 |
| Avis               | 1       | 10.88 |
| Azambuja           | 2       | 10.77 |

|                      |   |       |
|----------------------|---|-------|
| Baião                | 1 | 10.81 |
| Barcelos             | 4 | 10.89 |
| Barrancos            | 1 | 10.70 |
| Barreiro             | 3 | 14.61 |
| Batalha              | 2 | 10.27 |
| Beja                 | 2 | 11.08 |
| Belmonte             | 1 | 12.41 |
| Benavente            | 2 | 12.89 |
| Bombarral            | 2 | 10.63 |
| Borba                | 1 | 10.02 |
| Boticas              | 1 | 8.04  |
| Braga                | 5 | 13.23 |
| Bragança             | 2 | 11.18 |
| Cabeceiras de Basto  | 1 | 10.16 |
| Cadaval              | 2 | 9.91  |
| Caldas da Rainha     | 3 | 12.74 |
| Calheta [R.A.A.]     | 2 | 5.82  |
| Calheta [R.A.M.]     | 1 | 12.02 |
| Câmara de Lobos      | 2 | 15.53 |
| Caminha              | 2 | 11.52 |
| Campo Maior          | 2 | 12.69 |
| Cantanhede           | 2 | 10.07 |
| Carraceda de Ansiães | 1 | 8.33  |
| Carregal do Sal      | 1 | 10.85 |
| Cartaxo              | 2 | 12.35 |
| Cascais              | 5 | 14.29 |
| Castanheira de Pêra  | 1 | 9.52  |
| Castelo Branco       | 3 | 11.27 |
| Castelo de Paiva     | 1 | 11.71 |
| Castelo de Vide      | 1 | 9.98  |
| Castro Daire         | 1 | 8.25  |
| Castro Marim         | 1 | 11.97 |
| Castro Verde         | 2 | 9.90  |
| Celorico da Beira    | 1 | 10.36 |
| Celorico de Basto    | 1 | 11.02 |
| Chamusca             | 1 | 10.86 |
| Chaves               | 2 | 11.48 |
| Cinfães              | 1 | 11.37 |
| Coimbra              | 2 | 16.51 |
| Condeixa-a-Nova      | 2 | 11.33 |
| Constância           | 2 | 11.78 |
| Coruche              | 2 | 10.11 |
| Corvo                | 1 | 0.00  |
| Covilhã              | 3 | 11.93 |
| Crato                | 1 | 10.37 |
| Cuba                 | 1 | 9.88  |
| Elvas                | 1 | 14.00 |
| Entroncamento        | 2 | 12.28 |
| Espinho              | 2 | 14.64 |
| Esposende            | 2 | 11.28 |
| Estarreja            | 2 | 10.99 |

|                             |   |       |
|-----------------------------|---|-------|
| Estremoz                    | 2 | 10.63 |
| Évora                       | 3 | 12.42 |
| Fafe                        | 3 | 12.32 |
| Faro                        | 3 | 14.98 |
| Felgueiras                  | 3 | 11.30 |
| Ferreira do Alentejo        | 1 | 10.82 |
| Ferreira do Zêzere          | 1 | 8.44  |
| Figueira da Foz             | 3 | 11.82 |
| Figueira de Castelo Rodrigo | 1 | 9.37  |
| Figueiró dos Vinhos         | 1 | 9.94  |
| Fornos de Algodres          | 1 | 9.26  |
| Freixo de Espada à Cinta    | 1 | 8.31  |
| Fronteira                   | 1 | 11.14 |
| Funchal                     | 4 | 15.72 |
| Fundão                      | 2 | 10.98 |
| Gavião                      | 1 | 11.21 |
| Góis                        | 1 | 8.72  |
| Golegã                      | 2 | 11.29 |
| Gondomar                    | 5 | 13.33 |
| Gouveia                     | 1 | 10.54 |
| Grândola                    | 1 | 8.91  |
| Guarda                      | 3 | 12.09 |
| Guimarães                   | 5 | 12.13 |
| Horta                       | 2 | 9.49  |
| Idanha-a-Nova               | 1 | 8.02  |
| Ílhavo                      | 2 | 12.36 |
| Lagoa                       | 2 | 12.75 |
| Lagoa [R.A.A.]              | 2 | 11.34 |
| Lagos                       | 2 | 13.78 |
| Lajes das Flores            | 2 | 3.72  |
| Lajes do Pico               | 2 | 6.78  |
| Lamego                      | 2 | 11.55 |
| Leiria                      | 4 | 10.84 |
| Lisboa                      | 8 | 25.11 |
| Loulé                       | 3 | 12.95 |
| Loures                      | 5 | 12.94 |
| Lourinhã                    | 2 | 10.71 |
| Lousã                       | 2 | 11.04 |
| Lousada                     | 2 | 11.92 |
| Mação                       | 1 | 9.15  |
| Macedo de Cavaleiros        | 1 | 8.40  |
| Machico                     | 2 | 15.38 |
| Madalena                    | 2 | 8.98  |
| Mafra                       | 3 | 11.09 |
| Maia                        | 4 | 13.61 |
| Mangualde                   | 2 | 10.91 |
| Manteigas                   | 1 | 9.73  |
| Marco de Canaveses          | 3 | 11.19 |
| Marinha Grande              | 2 | 11.32 |
| Marvão                      | 1 | 9.99  |
| Matosinhos                  | 5 | 15.64 |

|                      |   |       |
|----------------------|---|-------|
| Mealhada             | 2 | 11.00 |
| Mêda                 | 1 | 7.24  |
| Melgaço              | 1 | 9.09  |
| Mértola              | 1 | 7.24  |
| Mesão Frio           | 1 | 10.72 |
| Mira                 | 1 | 10.38 |
| Miranda do Corvo     | 2 | 10.73 |
| Miranda do Douro     | 1 | 8.07  |
| Mirandela            | 2 | 10.57 |
| Mogadouro            | 1 | 8.23  |
| Moimenta da Beira    | 1 | 8.68  |
| Moita                | 3 | 14.94 |
| Monção               | 1 | 11.29 |
| Monchique            | 1 | 9.68  |
| Mondim de Basto      | 1 | 9.60  |
| Monforte             | 1 | 12.14 |
| Montalegre           | 1 | 7.89  |
| Montemor-o-Novo      | 2 | 9.65  |
| Montemor-o-Velho     | 2 | 10.17 |
| Montijo              | 3 | 13.35 |
| Mora                 | 1 | 9.89  |
| Mortágua             | 1 | 8.80  |
| Moura                | 1 | 13.33 |
| Mourão               | 1 | 12.61 |
| Murça                | 1 | 8.68  |
| Murtosa              | 1 | 10.29 |
| Nazaré               | 2 | 12.18 |
| Nelas                | 1 | 10.13 |
| Nisa                 | 1 | 9.91  |
| Nordeste             | 1 | 6.98  |
| Óbidos               | 1 | 9.22  |
| Odemira              | 2 | 6.72  |
| Odivelas             | 3 | 14.68 |
| Oeiras               | 2 | 15.97 |
| Oleiros              | 1 | 5.57  |
| Olhão                | 2 | 12.79 |
| Oliveira de Azeméis  | 3 | 10.12 |
| Oliveira de Frades   | 2 | 10.23 |
| Oliveira do Bairro   | 2 | 10.78 |
| Oliveira do Hospital | 2 | 10.23 |
| Ourém                | 3 | 9.40  |
| Ourique              | 1 | 7.74  |
| Ovar                 | 3 | 12.42 |
| Paços de Ferreira    | 3 | 11.67 |
| Palmela              | 3 | 12.76 |
| Pampilhosa da Serra  | 1 | 7.75  |
| Paredes              | 3 | 11.93 |
| Paredes de Coura     | 1 | 10.70 |
| Pedrogão Grande      | 1 | 9.69  |
| Penacova             | 1 | 9.93  |
| Penafiel             | 3 | 10.78 |

|                          |   |       |
|--------------------------|---|-------|
| Penalva do Castelo       | 1 | 8.02  |
| Penamacor                | 1 | 5.82  |
| Penedono                 | 1 | 6.88  |
| Penela                   | 1 | 9.68  |
| Peniche                  | 2 | 12.10 |
| Peso da Régua            | 2 | 12.28 |
| Pinhel                   | 1 | 7.72  |
| Pombal                   | 3 | 9.44  |
| Ponta Delgada            | 3 | 13.06 |
| Ponta do Sol             | 1 | 12.00 |
| Ponte da Barca           | 1 | 10.79 |
| Ponte de Lima            | 3 | 10.13 |
| Ponte de Sor             | 1 | 14.28 |
| Portalegre               | 2 | 12.35 |
| Portel                   | 1 | 10.51 |
| Portimão                 | 3 | 14.64 |
| Porto                    | 6 | 23.52 |
| Porto de Mós             | 2 | 9.85  |
| Porto Moniz              | 1 | 13.56 |
| Porto Santo              | 2 | 13.79 |
| Póvoa de Lanhoso         | 2 | 11.29 |
| Póvoa de Varzim          | 3 | 12.90 |
| Povoação                 | 1 | 9.02  |
| Proença-a-Nova           | 1 | 8.45  |
| Redondo                  | 1 | 9.40  |
| Reguengos de Monsaraz    | 2 | 11.51 |
| Resende                  | 1 | 8.42  |
| Ribeira Brava            | 1 | 14.51 |
| Ribeira de Pena          | 1 | 8.47  |
| Ribeira Grande           | 2 | 9.79  |
| Rio Maior                | 2 | 11.37 |
| Sabrosa                  | 1 | 10.01 |
| Sabugal                  | 1 | 7.59  |
| Salvaterra de Magos      | 2 | 13.09 |
| Santa Comba Dão          | 1 | 10.98 |
| Santa Cruz               | 2 | 13.41 |
| Santa Cruz da Graciosa   | 2 | 7.78  |
| Santa Cruz das Flores    | 2 | 9.29  |
| Santa Maria da Feira     | 4 | 11.79 |
| Santa Marta de Penaguião | 1 | 9.85  |
| Santana                  | 1 | 14.26 |
| Santarém                 | 3 | 12.44 |
| Santiago do Cacém        | 2 | 9.69  |
| Santo Tirso              | 3 | 13.27 |
| São Brás de Alportel     | 1 | 12.95 |
| São João da Madeira      | 2 | 13.51 |
| São João da Pesqueira    | 1 | 6.56  |
| São Pedro do Sul         | 1 | 8.99  |
| São Roque do Pico        | 2 | 9.22  |
| São Vicente              | 1 | 12.01 |
| Sardoal                  | 1 | 10.50 |

|                          |   |       |
|--------------------------|---|-------|
| Sátão                    | 1 | 9.28  |
| Seia                     | 2 | 10.63 |
| Seixal                   | 5 | 13.27 |
| Sernancelhe              | 1 | 8.63  |
| Serpa                    | 1 | 11.92 |
| Sertã                    | 1 | 9.13  |
| Sesimbra                 | 2 | 11.51 |
| Setúbal                  | 4 | 13.72 |
| Sever do Vouga           | 1 | 9.60  |
| Silves                   | 2 | 11.23 |
| Sines                    | 2 | 11.36 |
| Sintra                   | 9 | 10.81 |
| Sobral de Monte Agraço   | 2 | 11.18 |
| Soure                    | 1 | 9.62  |
| Sousel                   | 1 | 10.10 |
| Tábua                    | 1 | 10.30 |
| Tabuaço                  | 1 | 8.83  |
| Tarouca                  | 1 | 9.30  |
| Tavira                   | 2 | 12.04 |
| Terras de Bouro          | 1 | 10.47 |
| Tomar                    | 2 | 11.96 |
| Tondela                  | 2 | 10.81 |
| Torre de Moncorvo        | 1 | 7.18  |
| Torres Novas             | 2 | 10.89 |
| Torres Vedras            | 3 | 11.06 |
| Trancoso                 | 1 | 8.51  |
| Trofa                    | 2 | 13.14 |
| Vagos                    | 2 | 10.65 |
| Vale de Cambra           | 2 | 9.60  |
| Valença                  | 1 | 12.02 |
| Valongo                  | 3 | 13.81 |
| Valpaços                 | 1 | 7.05  |
| Velas                    | 2 | 7.87  |
| Vendas Novas             | 2 | 10.25 |
| Viana do Alentejo        | 2 | 10.00 |
| Viana do Castelo         | 3 | 12.04 |
| Vidigueira               | 1 | 12.78 |
| Vieira do Minho          | 1 | 10.99 |
| Vila da Praia da Vitória | 2 | 8.70  |
| Vila de Rei              | 1 | 11.13 |
| Vila do Bispo            | 2 | 9.97  |
| Vila do Conde            | 3 | 12.24 |
| Vila do Porto            | 2 | 9.94  |
| Vila Flor                | 1 | 8.00  |
| Vila Franca de Xira      | 4 | 11.93 |
| Vila Franca do Campo     | 1 | 10.00 |
| Vila Nova da Barquinha   | 1 | 10.00 |
| Vila Nova de Cerveira    | 2 | 11.96 |
| Vila Nova de Famalicão   | 4 | 12.05 |
| Vila Nova de Foz Côa     | 1 | 7.49  |
| Vila Nova de Gaia        | 7 | 13.96 |

---

|                            |   |       |
|----------------------------|---|-------|
| Vila Nova de Paiva         | 1 | 9.82  |
| Vila Nova de Poiares       | 2 | 10.36 |
| Vila Pouca de Aguiar       | 1 | 9.64  |
| Vila Real                  | 3 | 11.95 |
| Vila Real de Santo António | 1 | 15.76 |
| Vila Velha de Ródão        | 1 | 9.29  |
| Vila Verde                 | 3 | 10.48 |
| Vila Viçosa                | 2 | 10.58 |
| Vimioso                    | 1 | 6.77  |
| Vinhais                    | 1 | 5.51  |
| Viseu                      | 3 | 12.44 |
| Vizela                     | 2 | 13.46 |
| Vouzela                    | 1 | 9.77  |

---
